# Supplementary material for: Intervención en la Iglesia de la Purísma Concepción (Aguíñiga, Ayala, Álava)
Source: PLOS journal article supplement (doi:10.1371/journal.pone.0011977), 2007-01-01
Supplement: S4 (10.1371/journal.pone.0011977.s004) [file journal.pone.0011977.s004]

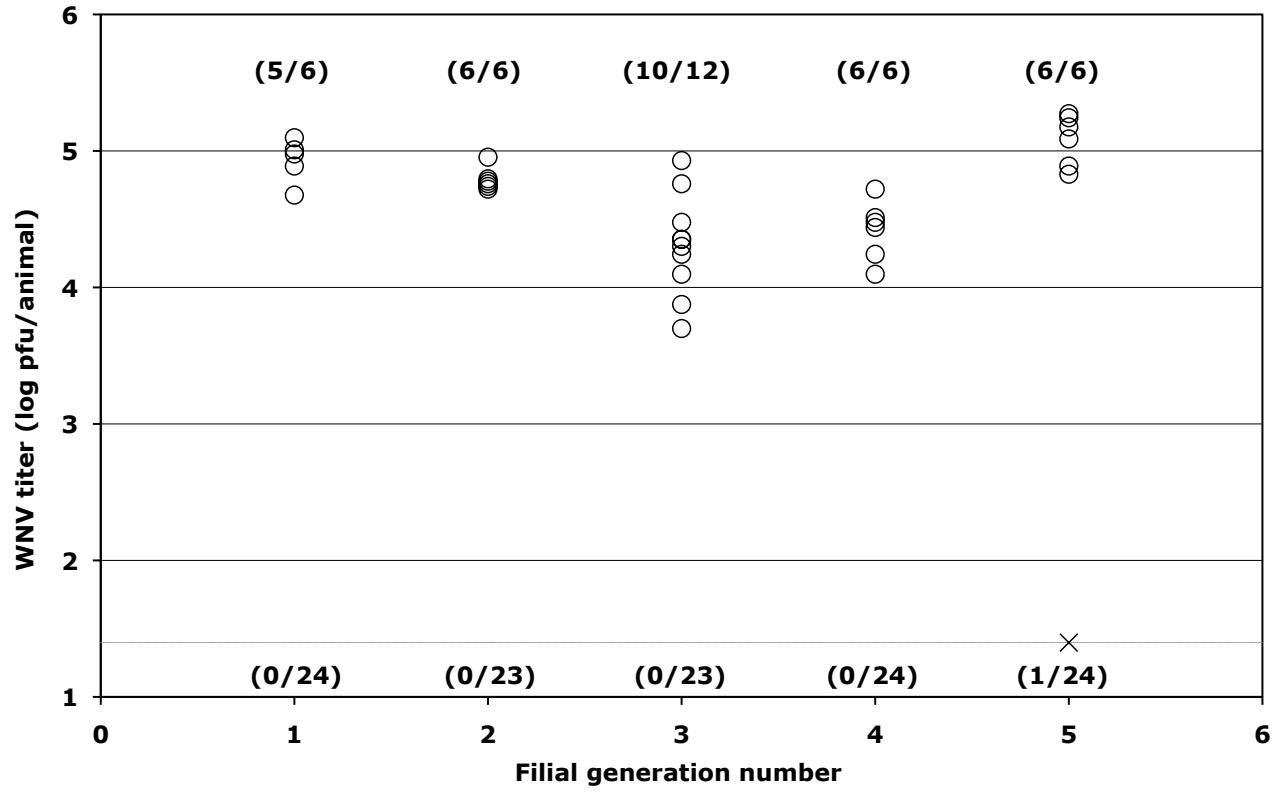

Figure S3. The WNV resistance phenotype observed in *Ago2<sup>414</sup>* flies is caused by a maternal cytoplasmic factor.
